# Supplementary material for: Functionalized multi-walled carbon nanotubes in an aldol reaction
Source: Royal Society of Chemistry journal article supplement (doi:10.1039/c4nr06543c), 2015-01-01
Supplement: c4nr06543c1.pdf [file c4nr06543c1.pdf]

## Electronic Supplementary Information

### Functionalized multi-walled carbon nanotubes in an aldol reaction

D. D. Chronopoulos,<sup>‡a</sup> C. G. Kokotos,<sup>‡b</sup> N. Karousis,<sup>a</sup> G. Kokotos,<sup>\*b</sup> N. Tagmatarchis<sup>\*a</sup>

<sup>a</sup> Theoretical and Physical Chemistry Institute, National Hellenic Research Foundation, 48 Vassileos Constantinou Avenue, Athens 116 35, Greece.

<sup>b</sup> Laboratory of Organic Chemistry, Department of Chemistry, University of Athens, Panepistimiopolis, 15771 Athens, Greece.

<sup>‡</sup> These authors contributed equally in this work.

**Synthesis of 5:** To a stirring solution of (2*S*, 4*R*)-di-*tert*-butyl 4-hydroxypyrrolidine-1,2-dicarboxylate (0.19 g, 0.65 mmol) in dry CH<sub>2</sub>Cl<sub>2</sub> (10 mL), glutaric anhydride (0.15 g, 1.30 mmol) and DMAP (15 mg, 0.10 mmol) were added consecutively. The reaction mixture was left stirring at room temperature for 72 h. The solvent was removed in vacuo and the product was purified by column chromatography with CH<sub>2</sub>Cl<sub>2</sub>/CH<sub>3</sub>OH 9/1 as the eluent, to afford **5**<sup>1</sup> (0.20 g, 77 %). [ $\alpha$ ]<sub>D</sub><sup>20</sup> = -37.9 (*c* = 1.0, CH<sub>2</sub>Cl<sub>2</sub>); <sup>1</sup>H NMR (200 MHz, CDCl<sub>3</sub>)  $\delta$  (ppm) 6.98-6.55 (br s, 1H), 5.35-5.17 (m, 1H), 4.33-4.09 (m, 1H), 3.71-3.43 (m, 2H), 2.41-2.21 (m, 5H), 2.19-1.97 (m, 1H), 1.96-1.77 (m, 2H), 1.41 (s, 18H); <sup>13</sup>C NMR (50 MHz, CDCl<sub>3</sub>)  $\delta$  (ppm) 177.9, 172.6, 171.8, 154.2, 81.8, 80.8, 72.1 (73.0), 58.6, 52.1 (52.4), 36.8 (35.7), 33.3 (33.1), 28.5, 28.2, 28.1, 19.9; MS 402 (M+H<sup>+</sup>, 21).

**Synthesis of 8:** A solution of proline derivative **5** (0.10 g, 0.25 mmol) in MeOH/EtOH (1:1) (10 mL) was treated with an ethereal solution of TMSCHN<sub>2</sub> at 0 °C until yellow colour persisted. The reaction mixture was left stirring for 1 h at room temperature. The reaction was then quenched with a few drops of acetic acid until the yellow colour disappeared. The solvent was removed in vacuo and the solvent was removed and the crude product was used in the next reaction as it is. The above crude mixture was diluted in CH<sub>2</sub>Cl<sub>2</sub> (5 mL) and trifluoroacetic acid (5 mL) was added. The mixture was stirred at room temperature for 18 h. After removal of the solvent and the excess of TFA under reduced pressure, the crude residue was purified by column chromatography on silica gel using CH<sub>2</sub>Cl<sub>2</sub>/CH<sub>3</sub>OH 8/2 as the eluent, yielding the product (55 mg, 62% for the two steps). [ $\alpha$ ]<sub>D</sub><sup>20</sup> = -6.9 (*c* = 1.0, CHCl<sub>3</sub>); <sup>1</sup>H NMR (200 MHz, CDCl<sub>3</sub>)  $\delta$  (ppm) 9.13-9.08 (br s, 1H), 5.45-5.25 (m, 1H), 4.71-4.37 (m, 1H), 3.86-3.41 (m, 5H), 2.61-2.23 (m, 6H), 2.01-1.79 (m, 2H), 1.45 (s, 1H); <sup>13</sup>C NMR (50 MHz, CDCl<sub>3</sub>)  $\delta$  (ppm) 173.6 (173.5), 172.3 (172.2), 171.7 (171.6), 162.8 (q, *J* = 73 Hz), 116.6 (q, *J* = 289 Hz), 72.5 (72.2), 58.8 (59.0), 51.7 (51.6), 51.4 (51.3), 34.3 (34.9), 32.8 (33.0), 27.7 (29.7), 19.6 (20.0); <sup>19</sup>F NMR (188 MHz, CDCl<sub>3</sub>)  $\delta$  (ppm) -9.27 (s, CF<sub>3</sub>); MS 260 (M+H<sup>+</sup>, 32).

**Synthesis of 11:** To a stirring solution of 2-(2-benzyloxy)ethoxy)ethanol (0.56 g, 2.85 mmol) in dry CH<sub>2</sub>Cl<sub>2</sub> (15 mL), glutaric anhydride (0.65 g, 5.70 mmol) and DMAP (175 mg, 1.40 mmol) were added consecutively. The reaction mixture was left stirring at room temperature for 72 h. The reaction mixture was diluted with CH<sub>2</sub>Cl<sub>2</sub> (15 mL) and washed with aq. NaOH 1N (40 mL). The aqueous layer was acidified with HCl 1N (pH=1). The product was extracted CH<sub>2</sub>Cl<sub>2</sub> (3 x 35 mL). After removal of the solvent, the crude product was used without purification at the next step. To a stirring solution of the crude product (0.15 g, 0.48 mmol) in dry CH<sub>2</sub>Cl<sub>2</sub> (10 mL), (*S*)-Boc-3-aminopyrrolidine (0.08 mL, 0.48 mmol), WSCI (0.10 g, 0.53 mmol), HOBt (0.07 g, 0.53 mmol) and triethylamine (0.07 mL, 0.53 mmol) were added and the reaction mixture was left stirring at room

temperature for 20 h. The reaction mixture was diluted with CH<sub>2</sub>Cl<sub>2</sub> (10 mL) and washed with aq. HCl (1N, 10 mL), brine (10 mL), aq. NaOH (1N, 10 mL) and brine (10 mL). After drying over Na<sub>2</sub>SO<sub>4</sub> and filtration, the solvent was removed in vacuo. The crude mixture was used in the next step.

To a stirring solution of the crude product in absolute ethanol (10 mL), 10% Pd/C was added and the reaction mixture was left stirring under H<sub>2</sub> atmosphere for 16 h. After filtration over Celite, the solvent was removed under vacuo. The crude mixture was purified by column chromatography with CH<sub>2</sub>Cl<sub>2</sub>/CH<sub>3</sub>OH 95/5 as the eluent, to afford the product. [ $\alpha$ ]<sub>D</sub> = -4.5 (*c* = 1.0, EtOH); <sup>1</sup>H NMR (200 MHz, CDCl<sub>3</sub>)  $\delta$  (ppm) 6.72 (br s, 1H), 4.41-4.17 (m, 3H), 3.72-3.01 (m, 10H), 2.34 (t, *J* = 6.8 Hz, 2H), 2.18 (t, *J* = 7.1 Hz, 2H), 2.07-1.67 (m, 3H), 1.40 (s, 9H), 1.17 (t, *J* = 7.0 Hz, 2H); <sup>13</sup>C NMR (50 MHz, CDCl<sub>3</sub>)  $\delta$  (ppm) 173.3, 172.3, 154.5, 79.5, 72.2, 68.9, 63.1, 61.4, 58.1, 48.5 (49.2), 43.6 (43.9), 34.8, 33.1, 28.4, 20.9, 18.2; MS 260 (M+H<sup>+</sup>, 32); HRMS exact mass calculated for [M+H]<sup>+</sup> (C<sub>18</sub>H<sub>32</sub>O<sub>7</sub>N<sub>2</sub>)<sup>+</sup> requires *m/z* 388.2210 found *m/z* 388.2221.

## References

1. E. Bellis and G. Kokotos, *Tetrahedron*, 2005, **61**, 8669.

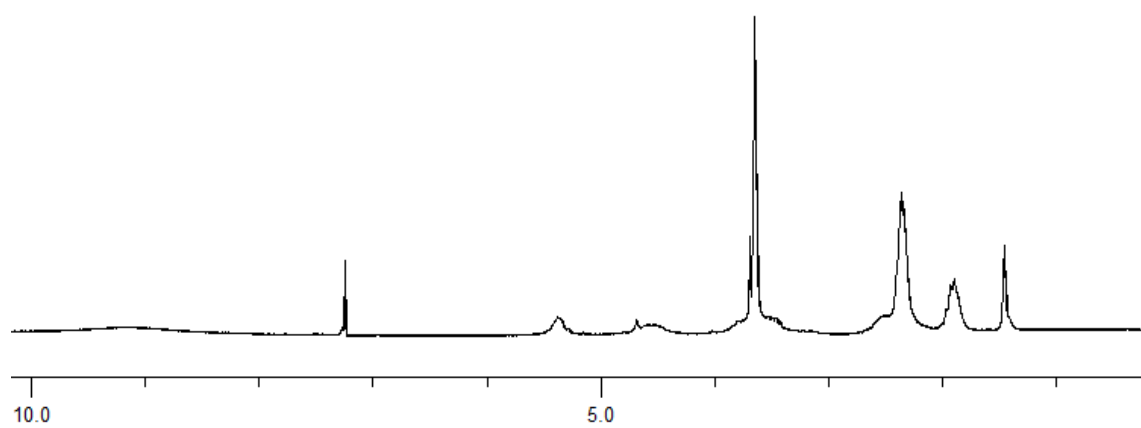

**Fig. S1**  $^1\text{H}$  NMR spectrum of compound **8**.

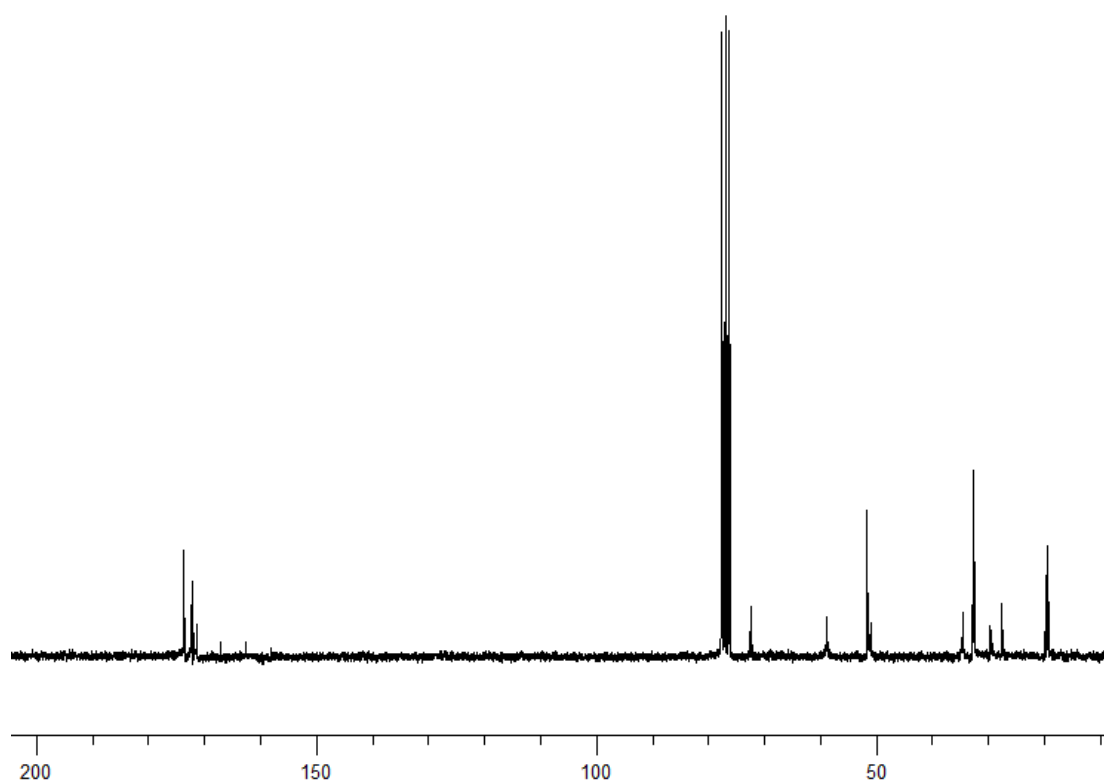

**Fig. S2**  $^{13}\text{C}$  NMR spectrum of compound **8**.

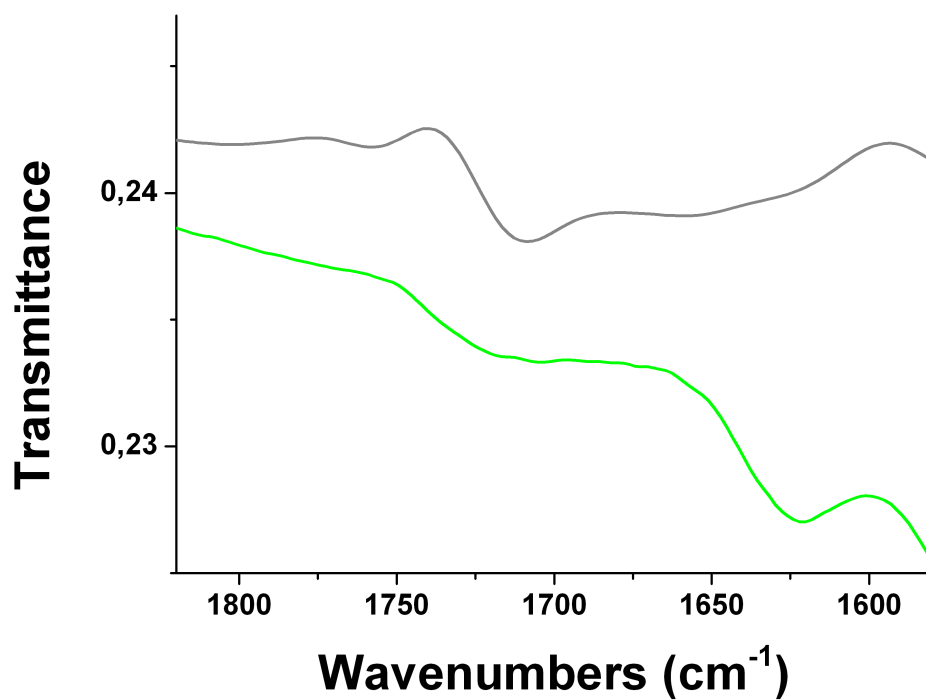

**Fig. S3** ATR-IR spectra of oxidized MWCNTs **1** (gray) and MWCNT-based material **10** (green).

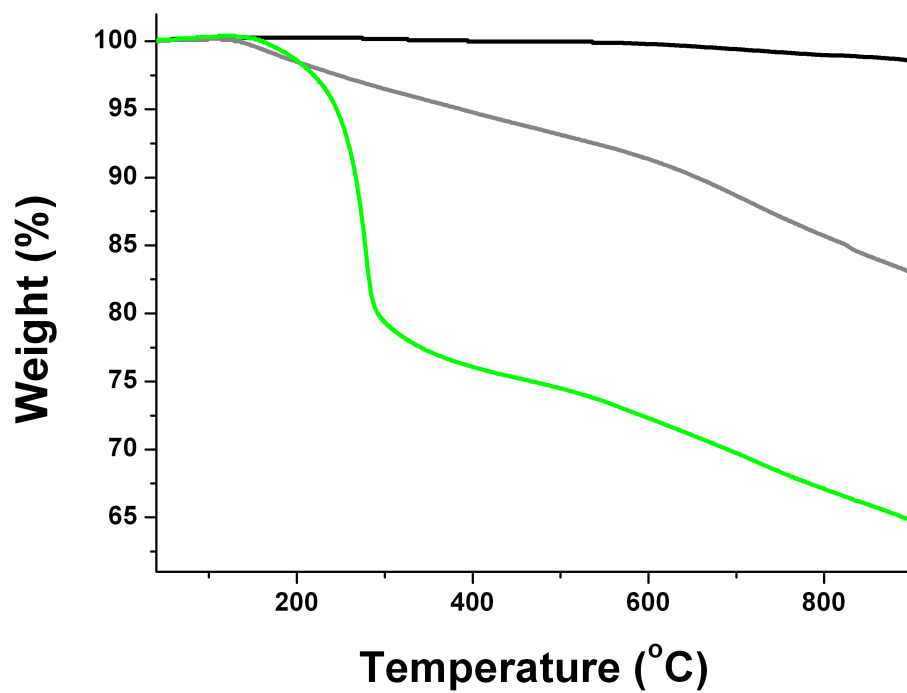

**Fig. S4** Thermographs of pristine MWCNTs (black), oxidized MWCNTs **1** (gray) and MWCNT-based material **10** (green), obtained under nitrogen atmosphere.

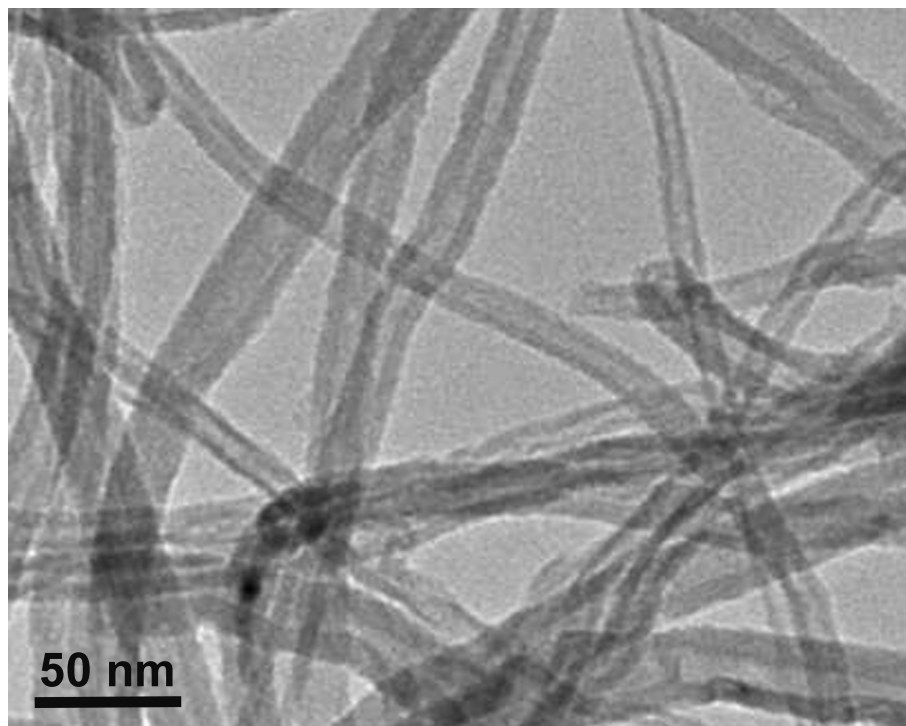

**Fig. S5** Representative TEM image of MWCNT-based material **10**.

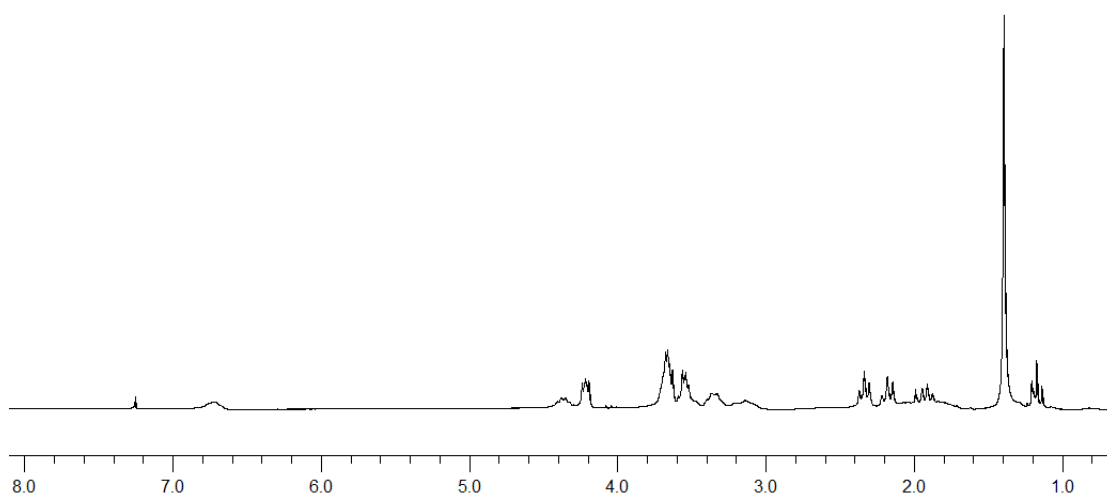

**Fig. S6**  $^1\text{H}$  NMR spectrum of compound **11**.

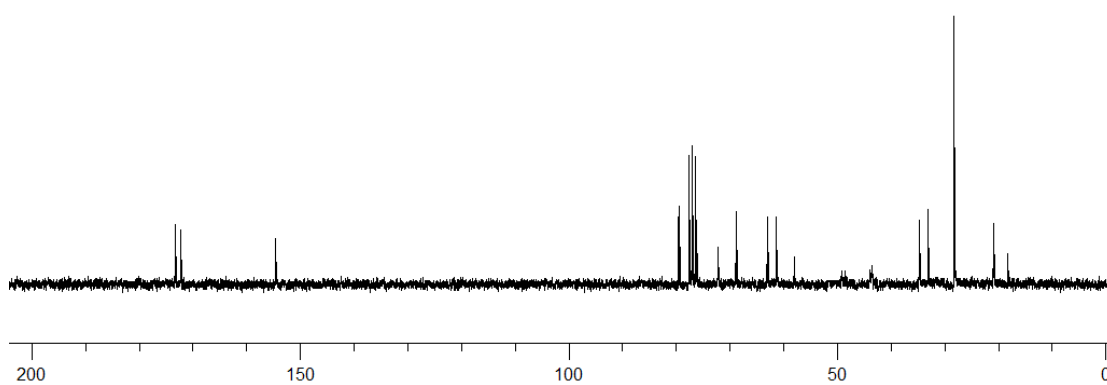

**Fig. S7**  $^{13}\text{C}$  NMR spectrum of compound **11**.

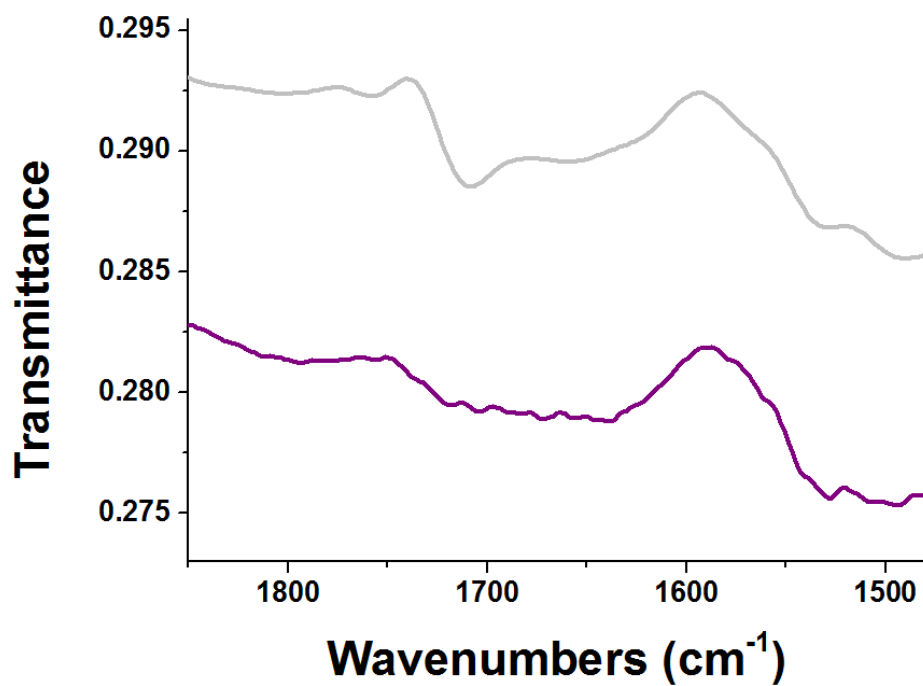

**Fig. S8:** ATR-IR spectra of oxidized MWCNTs **1** (gray) and MWCNT-based material **13** (purple).

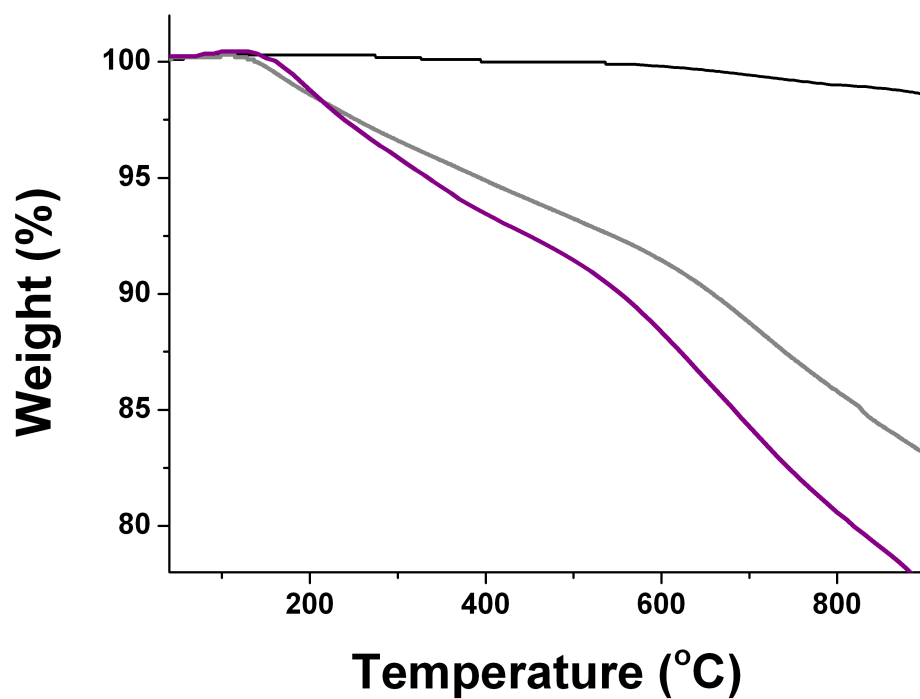

**Fig S9** Thermographs of pristine MWCNTs (black), oxidized MWCNTs **1** (gray) and MWCNT-based material **13** (purple), obtained under nitrogen atmosphere.

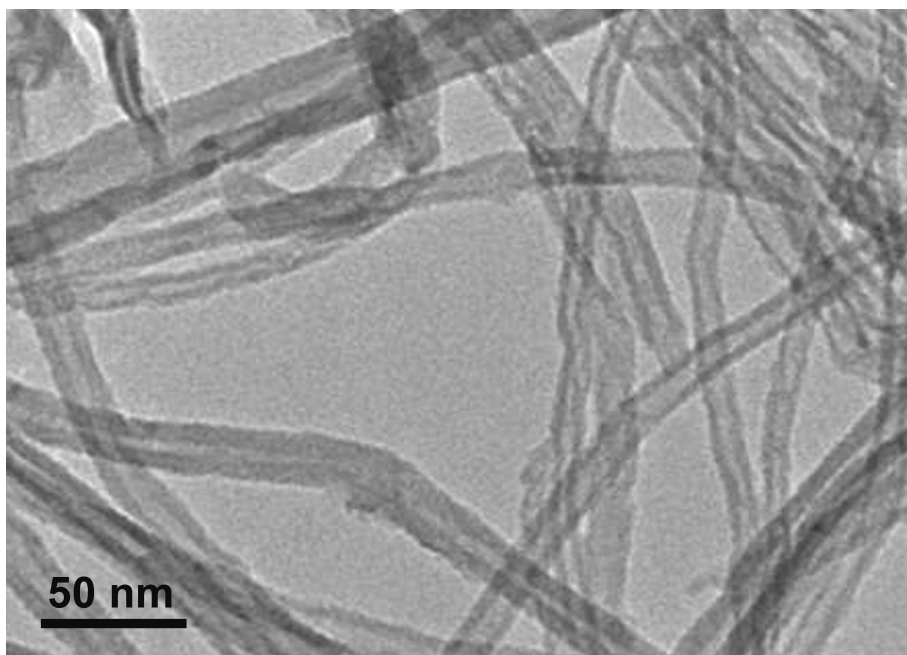

**Fig. S10** Representative TEM image of MWCNT-based material **13**.
